# Supplementary material for: METTL3-dependent MALAT1 delocalization drives c-Myc induction in thymic epithelial tumors
Source: PubMed Central journal article supplement (PMC8447796; doi:10.1186/s13148-021-01159-6), 2021-09-16
Supplement: 13148_2021_1159_MOESM4_ESM.pdf [file 13148_2021_1159_MOESM4_ESM.pdf]

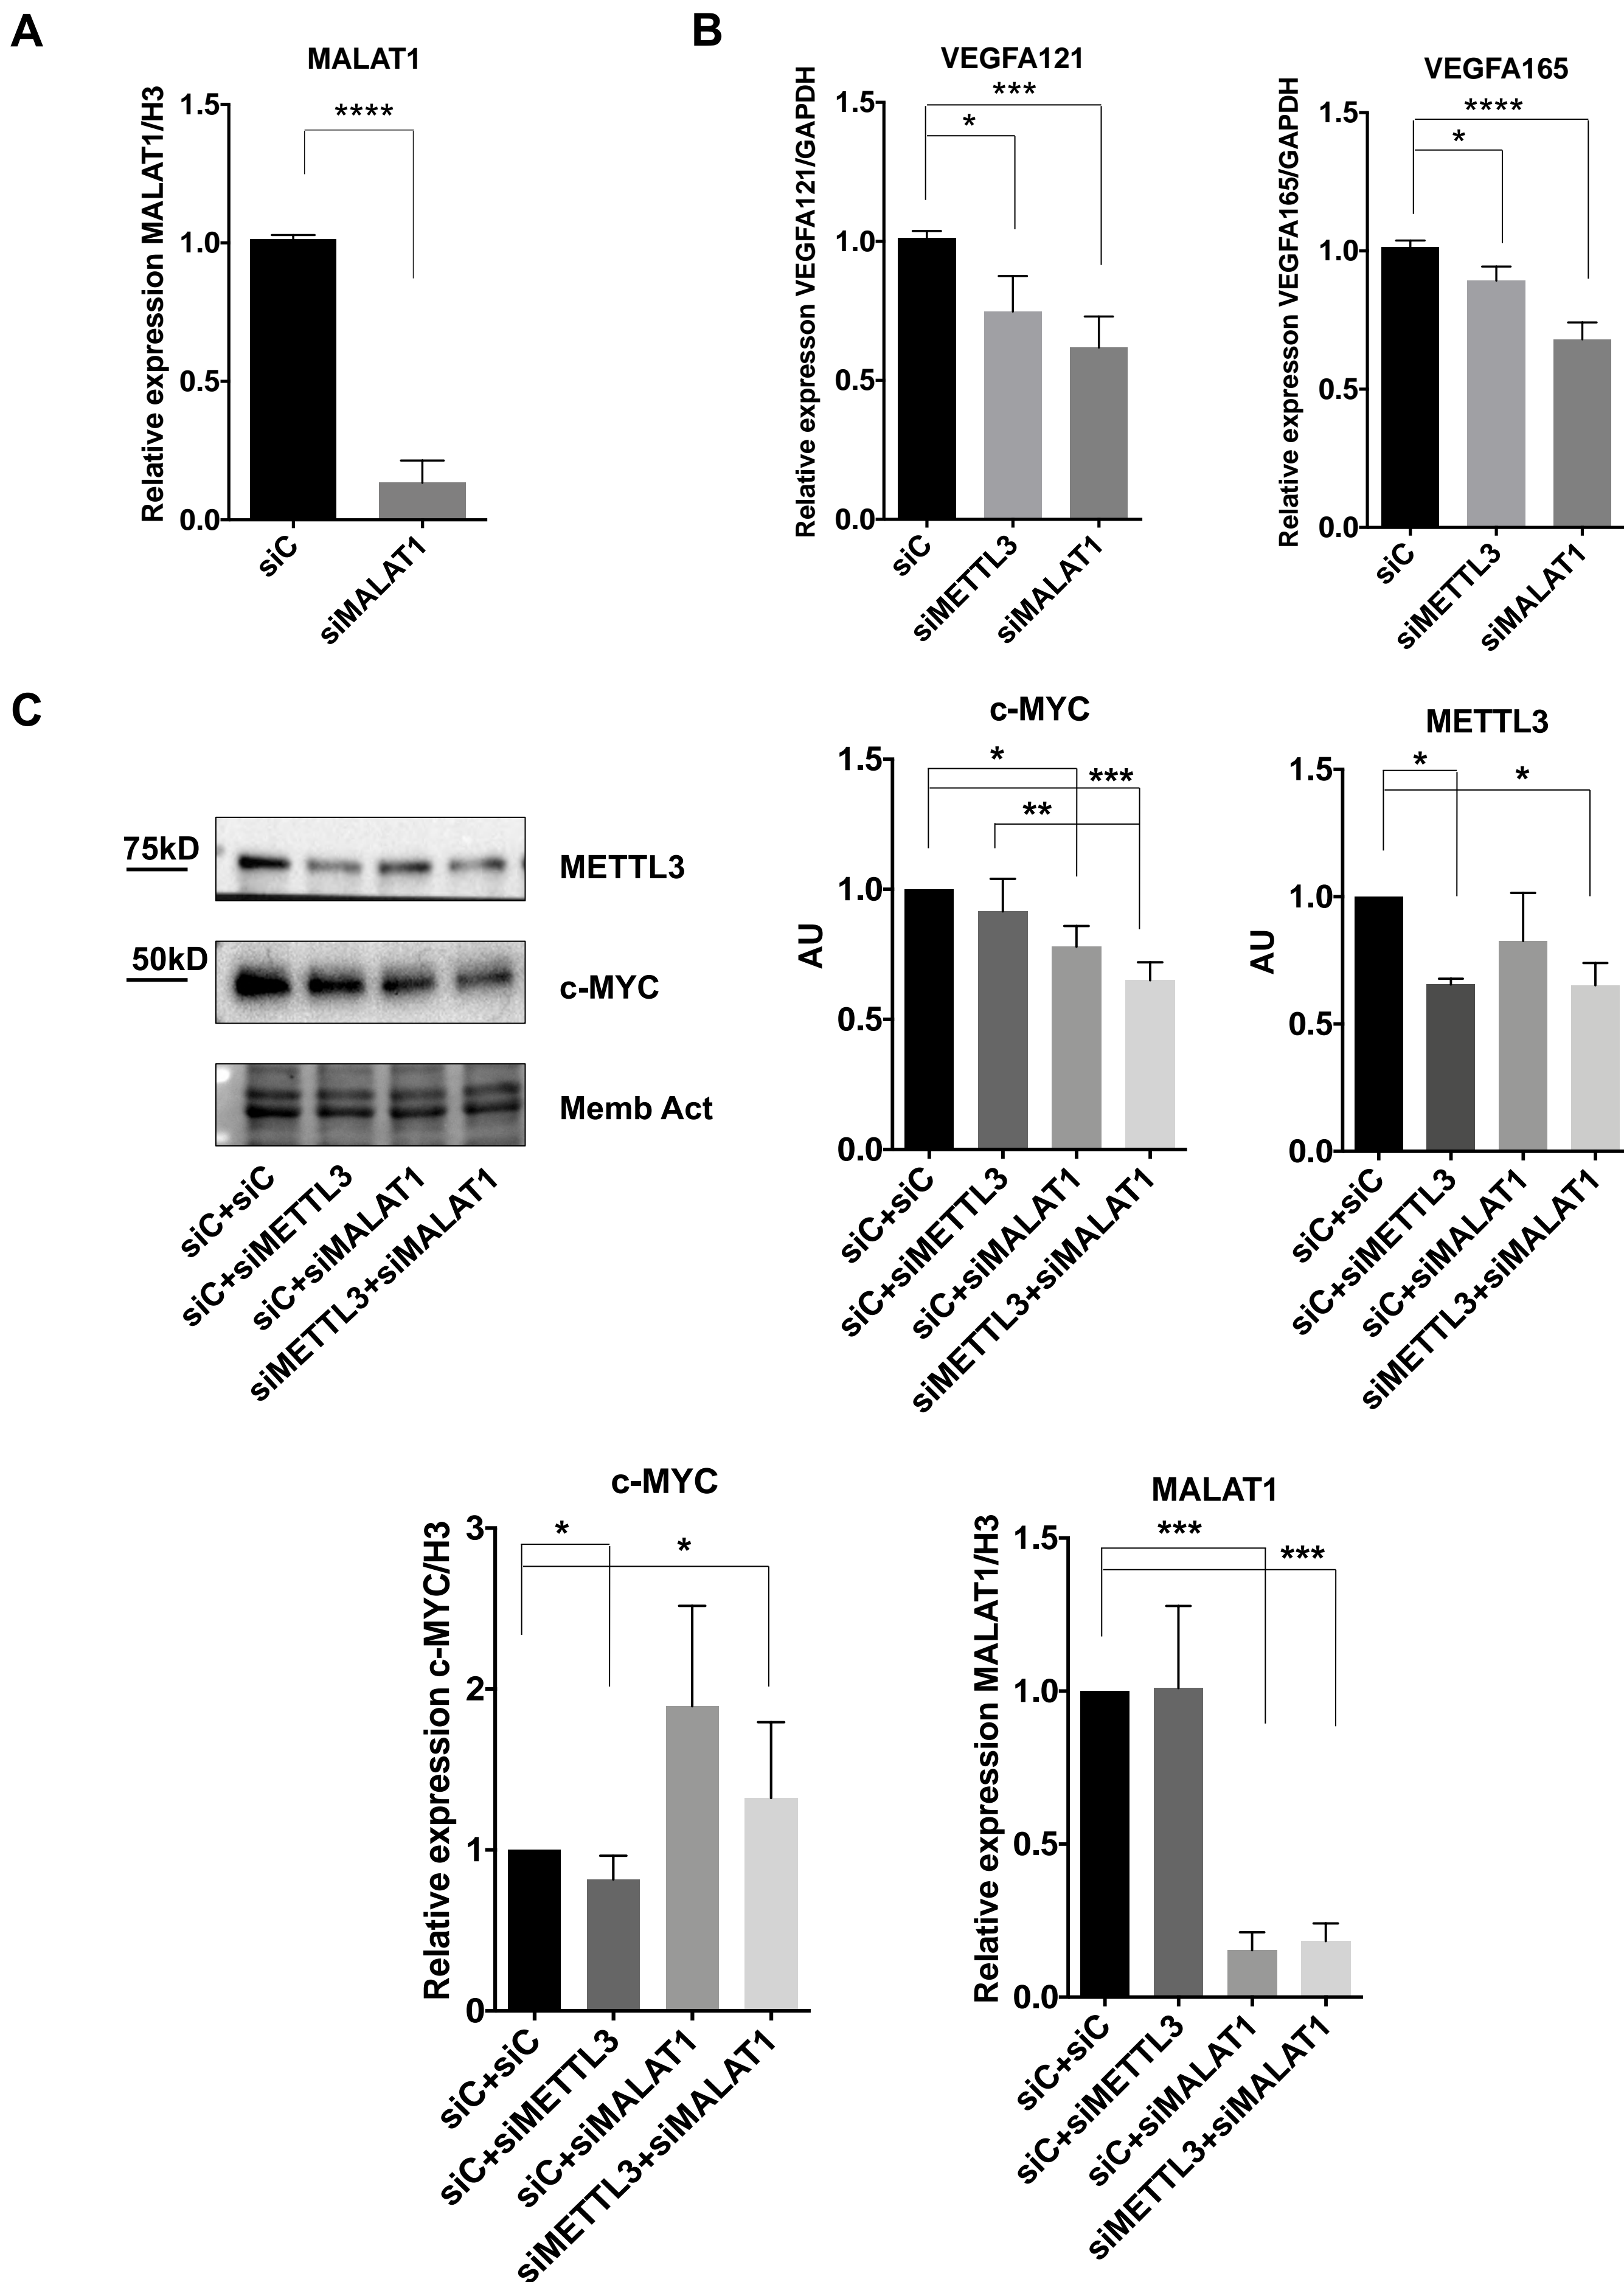

**Suppl. Fig. 4.** **A** Malat1 expression after 72h of silencing (n=3). **B** VEGF121 and VEGF165 expression was analyzed by qRT-PCR after 72h of METTL3 and MALAT1 depletion in TET cells (n=3). **C** Representative Western blot of c-MYC after 24h of METTL3 depletion (siC+siMETTL3 sample), 72h of MALAT1 depletion (siC+siMALAT1 sample) and 24h of METTL3 and 72h of MALAT1 depletion (siMETTL3+siMALAT1 sample). On the top is represented c-MYC and METTL3 quantification, normalized on Membrane Activation (c-MYC n=4, METTL3 n=3), while on the bottom, c-MYC and Malat1 expression was analyzed by qRT-PCR (n=3).
