# Supplementary material for: METTL3-dependent MALAT1 delocalization drives c-Myc induction in thymic epithelial tumors
Source: PubMed Central journal article supplement (PMC8447796; doi:10.1186/s13148-021-01159-6), 2021-09-16
Supplement: 13148_2021_1159_MOESM5_ESM.pdf [file 13148_2021_1159_MOESM5_ESM.pdf]

A

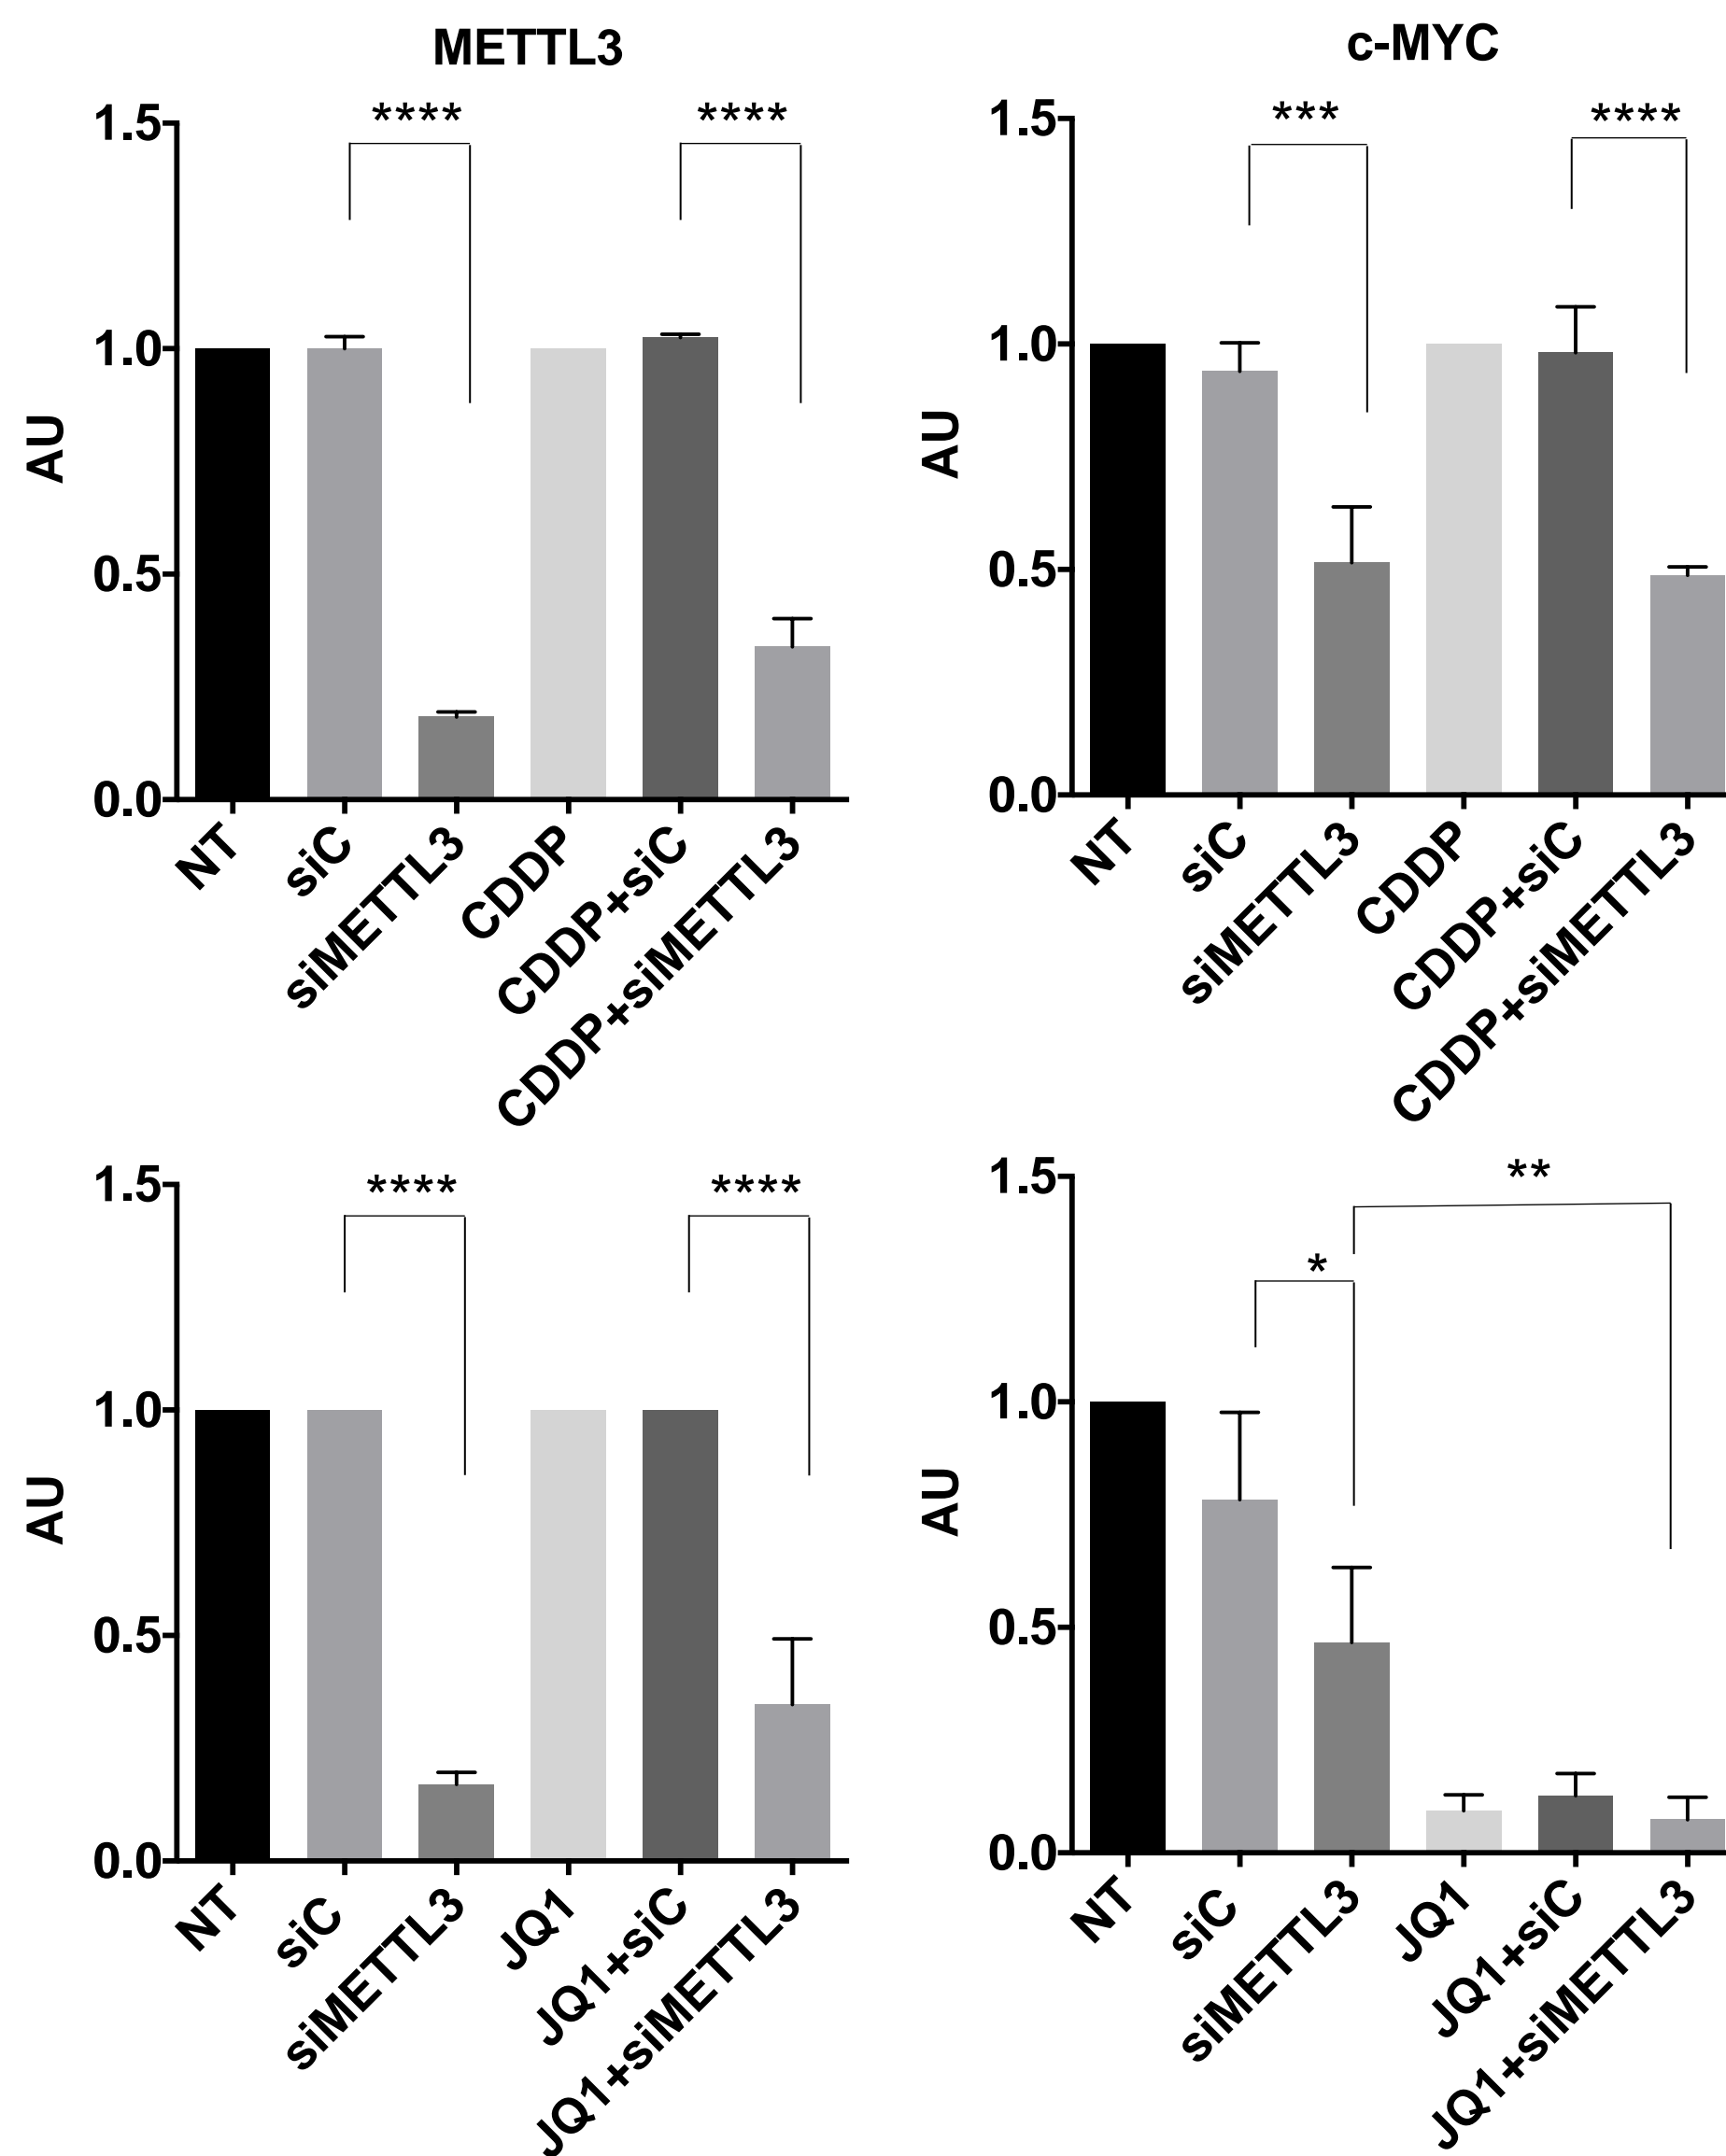

B

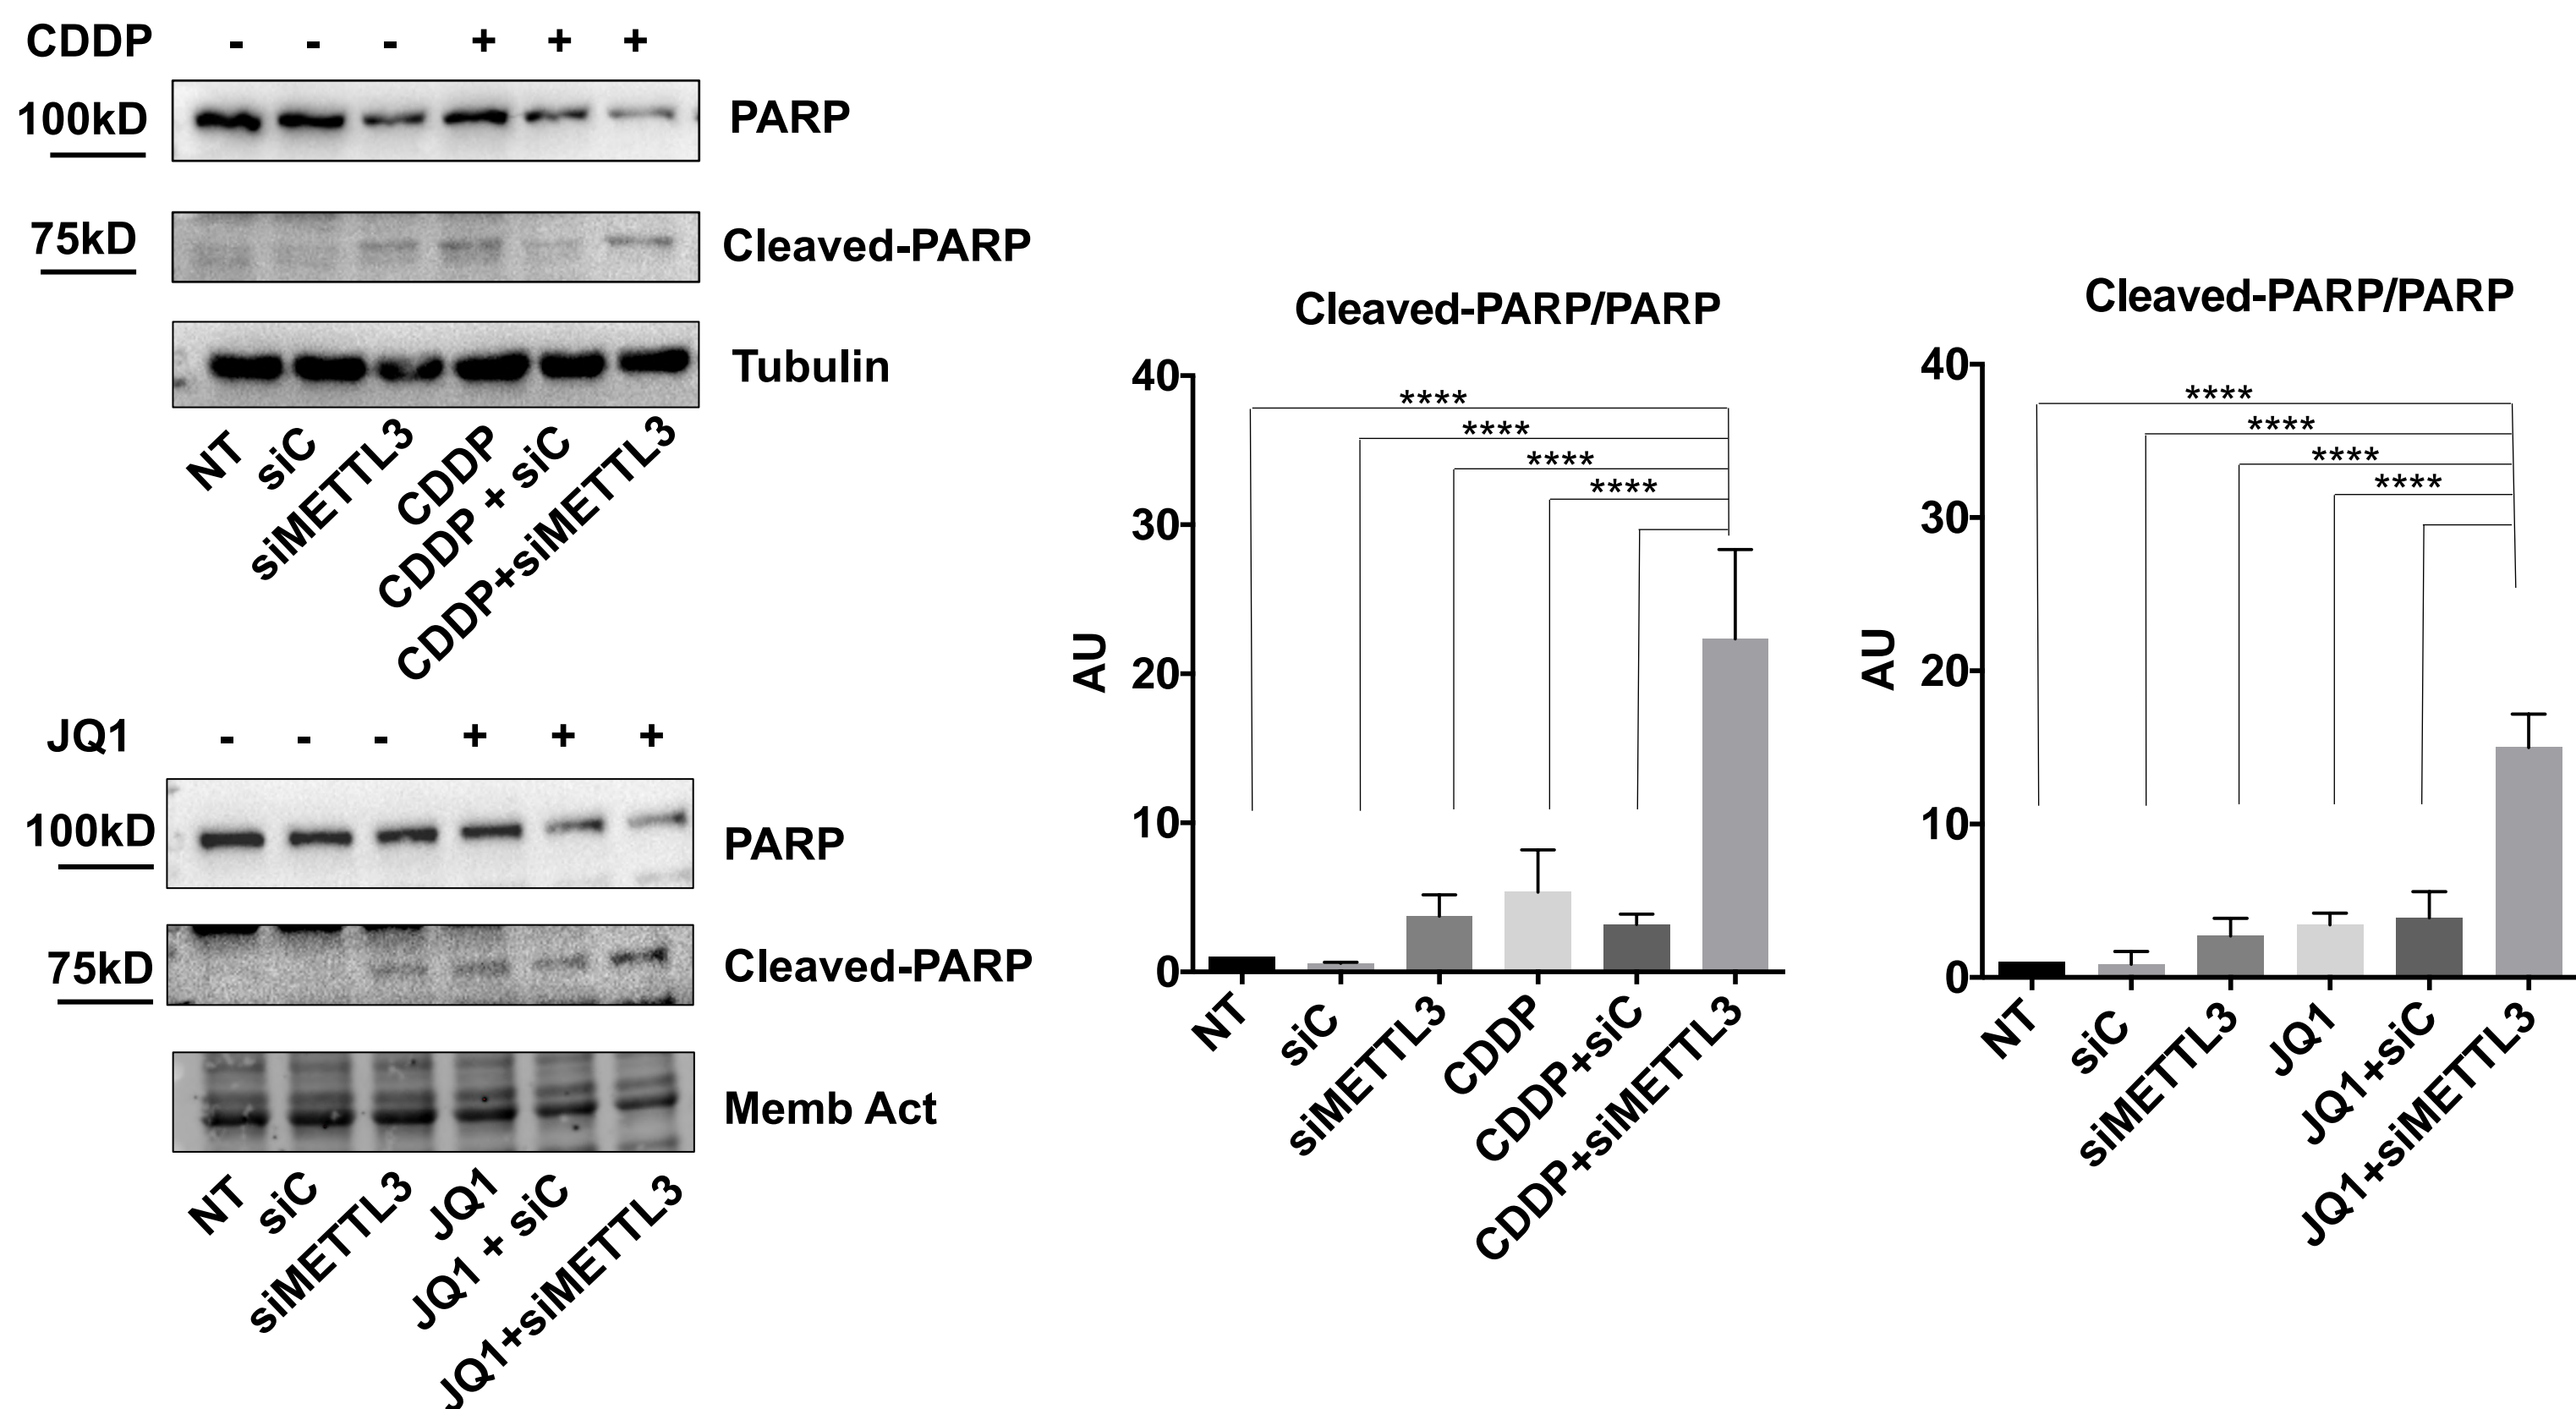

**Suppl. Fig. 5. A** METTL3 and c-MYC protein levels in TC cells treated with CDDP (top) and JQ1 (bottom) for 48h. The treatment was performed 24h after METTL3 silencing (n=3). **B** Representative Western Blot of Cleaved-PARP and PARP and on the right the ratio between Cleaved-PARP and PARP (n=3).
